# Supplementary material
Source: PubMed Central journal article supplement (PMC9683693)
Supplement: mmc1.pdf [file mmc1.pdf]

# Long term effects of COVID-19

This study is being carried out by the Public Health department to assess the long term effects experienced by those who were diagnosed with COVID-19 during the second wave of the pandemic in Malta after being declared recovered from the virus.

Your participation in this study is voluntary, and if you feel uncomfortable to continue answering the questions, you can stop at any time without any effect on your statutory rights or the medical care that you receive.

The data collected in this study will be processed according to the General Data Protection Regulations (GDPR). All the information collected will be kept confidential.

Thank you for your participation.

**\*Required**

1. I have read and understood the above written information and give my consent to participate in the study. \*

*Mark only one oval.*

I agree

2. Are you completing this questionnaire on your behalf or on behalf of a dependent person (e.g. child, disabled person, older person) who is not able to answer the questionnaire? \*

*Mark only one oval.*

I am completing this survey on my behalf

I am completing this survey on behalf of someone else (dependent person)

## 1. Basic Information

This section provides basic demographic information about yourself.

3. 1.1 What is your gender? \*

*Mark only one oval.*

Male

Female

4. 1.2 What is your age? \*

---

5. 1.3 What is your nationality? \*

*Mark only one oval.*

Maltese

European

Non-European (3rd country national)

6. 1.4 Where is your permanent residence? \*

*Mark only one oval.*

Malta

Another country

7. 1.5 Are you a health care professional? \*

*Tick all that apply.*

No

I am a nurse

I am a doctor

I am an allied health professional

2.  
Diagnosis  
of COVID-  
19

This section deals with the period immediately following the diagnosis of Coronavirus, when you were first called and informed of the positive result.

8. 2.1 How did you catch the Coronavirus? \*

*Mark only one oval.*

- From a family member or person living in the same house
- From a friend
- From my place of work
- From abroad
- I do not know

9. 2.2 Did you have any COVID-19 related symptoms when you were first diagnosed with Coronavirus? \*

*Mark only one oval.*

- Yes
- No

10. 2.3 If yes, please indicate the symptom(s) you experienced and how long the symptom(s) lasted (tick ONLY one box for each symptom in each row below. Please choose "Not Applicable" if you did not experience this symptom).

*Tick all that apply.*

|                                     | 1-3<br>days              | 4-7<br>days              | 1-2<br>weeks             | 2-4<br>weeks             | 4-8<br>weeks             | >8<br>weeks              | Not<br>Applicable        |
|-------------------------------------|--------------------------|--------------------------|--------------------------|--------------------------|--------------------------|--------------------------|--------------------------|
| Fever                               | <input type="checkbox"/> |
| Cough                               | <input type="checkbox"/> |
| Sore throat                         | <input type="checkbox"/> |
| Fatigue                             | <input type="checkbox"/> |
| Muscle aches and<br>pains (myalgia) | <input type="checkbox"/> |
| Headache                            | <input type="checkbox"/> |
| Loss of smell                       | <input type="checkbox"/> |
| Loss of taste                       | <input type="checkbox"/> |
| Diarrhea                            | <input type="checkbox"/> |
| Vomiting                            | <input type="checkbox"/> |
| Shortness of<br>breath              | <input type="checkbox"/> |
| Red<br>eyes/conjunctivitis          | <input type="checkbox"/> |
| Other                               | <input type="checkbox"/> |

11. 2.4 Give an indication of the sequence of symptoms you experienced (tick ONLY one box for each symptom in each row below).

*Mark only one oval per row.*

|                                  | First                 | Second                | Third                 | Fourth                | Fifth                 | Not applicable        |
|----------------------------------|-----------------------|-----------------------|-----------------------|-----------------------|-----------------------|-----------------------|
| Fever                            | <input type="radio"/> |
| Cough                            | <input type="radio"/> |
| Sore throat                      | <input type="radio"/> |
| Fatigue                          | <input type="radio"/> |
| Muscle aches and pains (myalgia) | <input type="radio"/> |
| Headache                         | <input type="radio"/> |
| Loss of smell                    | <input type="radio"/> |
| Loss of taste                    | <input type="radio"/> |
| Vomiting                         | <input type="radio"/> |
| Shortness of breath              | <input type="radio"/> |

12. 2.5 Did you need hospitalisation? \*

*Mark only one oval.*

Yes

No

13. 2.6 If yes, for how long (in days)?

\_\_\_\_\_

14. 2.7 Did you require or receive any of the following treatment(s) whilst in hospital?

*Mark only one oval per row.*

|                                                       | Yes                   | No                    | I do not know         |
|-------------------------------------------------------|-----------------------|-----------------------|-----------------------|
| Oxygen therapy                                        | <input type="radio"/> | <input type="radio"/> | <input type="radio"/> |
| Clexane injections (injections to prevent blot clots) | <input type="radio"/> | <input type="radio"/> | <input type="radio"/> |
| Chest physiotherapy                                   | <input type="radio"/> | <input type="radio"/> | <input type="radio"/> |

**3. Problems developed after being declared recovered by the Public Health Response team**

This section deals with any symptoms or problems developing after you were declared recovered from Coronavirus by the Public Health Response team and were allowed to go out of quarantine.

15. 3.1 Since you were discharged (that is, declared recovered from COVID-19), did you develop any symptoms of ill-health? \*

*Mark only one oval.*

Yes

No

16. 3.2 If yes, please specify what the symptoms you experienced and how long they lasted? (Please choose "Not Applicable" if you did not experience that symptom)

Mark only one oval per row.

|                                                                         | 1-3<br>days           | 4-7<br>days           | 1-2<br>weeks          | 2-4<br>weeks          | 4-8<br>weeks          | > 8<br>weeks          | Not<br>applicable     |
|-------------------------------------------------------------------------|-----------------------|-----------------------|-----------------------|-----------------------|-----------------------|-----------------------|-----------------------|
| Fatigue                                                                 | <input type="radio"/> |
| Muscle aches and<br>pains (myalgia)                                     | <input type="radio"/> |
| Weakness in arms,<br>legs or body                                       | <input type="radio"/> |
| Pins and needles in<br>your arms, legs or<br>body                       | <input type="radio"/> |
| Dizziness                                                               | <input type="radio"/> |
| Headache/migraines                                                      | <input type="radio"/> |
| Loss of smell                                                           | <input type="radio"/> |
| Altered smell<br>(noticing smells that<br>only you are<br>experiencing) | <input type="radio"/> |
| Loss of taste                                                           | <input type="radio"/> |
| Altered taste<br>(tasting food or<br>drink differently that<br>before)  | <input type="radio"/> |
| Excessive sweating                                                      | <input type="radio"/> |
| Difficulty sleeping                                                     | <input type="radio"/> |
| Difficulty<br>concentrating                                             | <input type="radio"/> |
| Confusion                                                               | <input type="radio"/> |
| Short term memory<br>loss                                               | <input type="radio"/> |
| Blurring of vision                                                      | <input type="radio"/> |

|                                                                         |                       |                       |                       |                       |                       |                       |                       |
|-------------------------------------------------------------------------|-----------------------|-----------------------|-----------------------|-----------------------|-----------------------|-----------------------|-----------------------|
| Fits or seizures                                                        | <input type="radio"/> |
| Stroke                                                                  | <input type="radio"/> |
| Low grade fever<br>(37.3-38.3 degrees<br>Celsius)                       | <input type="radio"/> |
| Moderately high<br>fever (38.4-39.7<br>degrees Celsius)                 | <input type="radio"/> |
| High grade fever<br>(>39.8 degrees<br>Celsius)                          | <input type="radio"/> |
| Palpitations                                                            | <input type="radio"/> |
| Fast heart rate                                                         | <input type="radio"/> |
| Slow heart rate                                                         | <input type="radio"/> |
| Stabbing chest pain                                                     | <input type="radio"/> |
| Chest discomfort<br>(like pressure on<br>chest)                         | <input type="radio"/> |
| Chest pain<br>associated with<br>coughing (during or<br>after coughing) | <input type="radio"/> |
| Sore throat                                                             | <input type="radio"/> |
| Nasal congestion                                                        | <input type="radio"/> |
| Dry cough                                                               | <input type="radio"/> |
| Productive cough<br>with yellow or green<br>catarrh/mucus               | <input type="radio"/> |
| Productive cough<br>with clear<br>catarrh/mucus                         | <input type="radio"/> |
| Shortness of breath<br>with coughing                                    | <input type="radio"/> |
| Shortness of breath                                                     | <input type="radio"/> |



with activity after  
going up a flight of  
steps or fast walking

|                                                                   |                       |                       |                       |                       |                       |                       |                       |
|-------------------------------------------------------------------|-----------------------|-----------------------|-----------------------|-----------------------|-----------------------|-----------------------|-----------------------|
| Abdominal pain                                                    | <input type="radio"/> |
| Nausea                                                            | <input type="radio"/> |
| Belching                                                          | <input type="radio"/> |
| Acid reflux (burning<br>pain due to<br>excessive stomach<br>acid) | <input type="radio"/> |
| Vomiting                                                          | <input type="radio"/> |
| Persistent diarrhoea                                              | <input type="radio"/> |
| Red eyes or eye<br>irritation                                     | <input type="radio"/> |
| Facial Rashes /<br>Swelling                                       | <input type="radio"/> |
| Body rashes, hives,<br>bumps or other skin<br>problem             | <input type="radio"/> |
| New diagnosis of<br>diabetes                                      | <input type="radio"/> |
| New diagnosis of<br>high cholesterol and<br>fat in the blood      | <input type="radio"/> |
| Hair Loss                                                         | <input type="radio"/> |
| Irregular periods                                                 | <input type="radio"/> |
| Feeling anxious,<br>more than usual                               | <input type="radio"/> |
| Feeling sad or<br>depressed, more<br>than usual                   | <input type="radio"/> |

17. 3.3 Have you been told by a doctor that you had any of the following when you were positive for COVID-19? \*

*Mark only one oval per row.*

|                                                          | Yes                   | No                    | I do not know         |
|----------------------------------------------------------|-----------------------|-----------------------|-----------------------|
| COVID Pneumonia (lung infection)                         | <input type="radio"/> | <input type="radio"/> | <input type="radio"/> |
| Pericarditis (inflammation of the covering of the heart) | <input type="radio"/> | <input type="radio"/> | <input type="radio"/> |
| Pulmonary embolism (blood clot in lungs)                 | <input type="radio"/> | <input type="radio"/> | <input type="radio"/> |

18. 3.4 Since you recovered from COVID-19, did you need to be admitted to hospital? \*

*Mark only one oval.*

- No  
 Yes

19. 3.5 If yes, was your health problem related to Coronavirus?

*Mark only one oval.*

- Yes, it was because of problems related to Coronavirus  
 No, it was for something not related to Coronavirus  
 I do not know why I was admitted to hospital

20. 3.6 Specify the problem:

*Tick all that apply.*

- Medical problem (Heart, Lungs, Stomach and Intestines, Rheumatology, Neurology)  
 Surgical problem (Heart, Chest, Stomach and Intestines, Orthopaedics, Neurosurgery, Ear, Nose and Throat, Ophthalmology)  
 Obstetric or Gynaecological problem  
 Paediatric medicine or surgery (if a child)

Other:  \_\_\_\_\_

21. 3.7 Did you make use of any of the following services or were you referred to any of the following outpatient services?

*Mark only one oval per row.*

|                                                                               | Yes                   | No                    | I do not know         |
|-------------------------------------------------------------------------------|-----------------------|-----------------------|-----------------------|
| General practitioner (family doctor or health centre doctor)                  | <input type="radio"/> | <input type="radio"/> | <input type="radio"/> |
| Cardiologist (doctor specializing in heart diseases)                          | <input type="radio"/> | <input type="radio"/> | <input type="radio"/> |
| Respiratory Physician (doctor specializing in lung diseases)                  | <input type="radio"/> | <input type="radio"/> | <input type="radio"/> |
| Gastroenterologist (doctor specializing in digestive system)                  | <input type="radio"/> | <input type="radio"/> | <input type="radio"/> |
| Rheumatologist (doctor specializing in musculoskeletal conditions)            | <input type="radio"/> | <input type="radio"/> | <input type="radio"/> |
| Neurologist (doctor specializing in brain and nerve conditions)               | <input type="radio"/> | <input type="radio"/> | <input type="radio"/> |
| ENT (doctor specializing in ear, nose and throat conditions)                  | <input type="radio"/> | <input type="radio"/> | <input type="radio"/> |
| Ophthalmology (doctor specializing in eye conditions)                         | <input type="radio"/> | <input type="radio"/> | <input type="radio"/> |
| General Surgeon (doctor specializing in surgery of common abdominal diseases) | <input type="radio"/> | <input type="radio"/> | <input type="radio"/> |
| Physiotherapist for rehabilitation                                            | <input type="radio"/> | <input type="radio"/> | <input type="radio"/> |

22. 3.8 Since testing positive, were you referred or have you had any of the following investigations performed:

*Tick all that apply.*

|                                                                              | Yes                      | No                       | I do not know            |
|------------------------------------------------------------------------------|--------------------------|--------------------------|--------------------------|
| ECHO (ultrasound test to check your heart)                                   | <input type="checkbox"/> | <input type="checkbox"/> | <input type="checkbox"/> |
| ECG (to check the electrical activity of the heart)                          | <input type="checkbox"/> | <input type="checkbox"/> | <input type="checkbox"/> |
| EMG (to check health of the muscles)                                         | <input type="checkbox"/> | <input type="checkbox"/> | <input type="checkbox"/> |
| Chest X-ray (picture of the lungs and chest)                                 | <input type="checkbox"/> | <input type="checkbox"/> | <input type="checkbox"/> |
| CT chest (detailed image of the lungs and chest)                             | <input type="checkbox"/> | <input type="checkbox"/> | <input type="checkbox"/> |
| CT PA (image of the arteries of the chest and lungs)                         | <input type="checkbox"/> | <input type="checkbox"/> | <input type="checkbox"/> |
| CT brain (detailed image of the brain)                                       | <input type="checkbox"/> | <input type="checkbox"/> | <input type="checkbox"/> |
| MR brain (detailed picture of the brain)                                     | <input type="checkbox"/> | <input type="checkbox"/> | <input type="checkbox"/> |
| Blood tests                                                                  | <input type="checkbox"/> | <input type="checkbox"/> | <input type="checkbox"/> |
| Perfusions scan ( a test to show how well the blood flows through the heart) | <input type="checkbox"/> | <input type="checkbox"/> | <input type="checkbox"/> |
| Ultrasound of the abdomen                                                    | <input type="checkbox"/> | <input type="checkbox"/> | <input type="checkbox"/> |

23. 3.9 Do you feel your health is back to normal? \*

*Mark only one oval.*

- Yes
- No
- I do not know

24. 3.10 If yes, how long after being declared recovered from COVID-19 do you feel your health was back to normal?

*Mark only one oval.*

- I never felt ill
- 2-7 days
- 1-2 weeks
- 2-4 weeks
- 4 to 8 weeks
- More than 8 weeks (2 months)
- Sometimes I still experience symptoms on and off

25. 3.11 If no, why do you feel that your health is NOT back to normal? Please tick all that apply :

*Tick all that apply.*

- Not applicable
- I have muscle aches and pains (myalgia)
- I have weakness in the arms or legs, face or body
- I am still suffering from loss of smell
- I am still suffering from loss of taste
- Sometimes I have fever (chills)
- I have shortness of breath or persistent cough when not exercising
- I am experiencing sharp chest pain or chest discomfort occasionally
- I feel tired
- I have headaches/migraines
- I feel dizzy
- I have difficulty sleeping
- I have anxiety and/or depression
- I have difficulty concentrating
- I feel confused
- I have trouble with my memory
- I suffer from fits or seizures
- I had a stroke
- I have pins and needles in my hands, arms, face or body
- I have palpitations (increase heart rate)
- I suffer from persistent diarrhoea
- I have rashes or swelling
- I suffered hair loss
- I have problems with my eyes
- I was diagnosed with diabetes
- I was diagnosed with high cholesterol

Other:  \_\_\_\_\_

26. 3.12 After you recovered, did you test positive again for Coronavirus?

*Mark only one oval.*

- Yes
- No
- I do not know

27. 3.13 If yes, after how many weeks were you re-infected (tested positive again) with COVID-19?

---

4. The social impact  
of COVID-19

This section deals with the social aspects and support received since testing positive for Coronavirus.

28. 4.1 Since testing positive: (Please indicate "Yes", "No" or "I do not know" for each of the following statements).

*Mark only one oval per row.*

|                                                                                                                                                    | Yes                   | No                    | I do not know         |
|----------------------------------------------------------------------------------------------------------------------------------------------------|-----------------------|-----------------------|-----------------------|
| I did not have any significant problems                                                                                                            | <input type="radio"/> | <input type="radio"/> | <input type="radio"/> |
| I am more aware of my health                                                                                                                       | <input type="radio"/> | <input type="radio"/> | <input type="radio"/> |
| I am more aware of my personal hygiene and hygiene etiquette                                                                                       | <input type="radio"/> | <input type="radio"/> | <input type="radio"/> |
| I am more aware of general cleanliness, such as washing hands and cleaning of surfaces                                                             | <input type="radio"/> | <input type="radio"/> | <input type="radio"/> |
| I started or increased physical activity                                                                                                           | <input type="radio"/> | <input type="radio"/> | <input type="radio"/> |
| I felt supported at work even during the time I was sick                                                                                           | <input type="radio"/> | <input type="radio"/> | <input type="radio"/> |
| I was allowed to phase in at work                                                                                                                  | <input type="radio"/> | <input type="radio"/> | <input type="radio"/> |
| I was made to work in full with no allowances paid                                                                                                 | <input type="radio"/> | <input type="radio"/> | <input type="radio"/> |
| I had problems with my job (lost my job or was struggling to find a job)                                                                           | <input type="radio"/> | <input type="radio"/> | <input type="radio"/> |
| I experienced difficulties with my accommodation (I had to move out, or found it difficult to move back in where I used to live after I recovered) | <input type="radio"/> | <input type="radio"/> | <input type="radio"/> |
| I did not have enough money to pay rent and buy food                                                                                               | <input type="radio"/> | <input type="radio"/> | <input type="radio"/> |
| I had difficulties in my relationships                                                                                                             | <input type="radio"/> | <input type="radio"/> | <input type="radio"/> |



29. 4.2 The following concern the support you got during and after having been diagnosed with Coronavirus:

*Mark only one oval per row.*

|                                                                                          | Yes                   | No                    | I do not know         |
|------------------------------------------------------------------------------------------|-----------------------|-----------------------|-----------------------|
| Did you seek counselling or professional help after you were diagnosed with Coronavirus? | <input type="radio"/> | <input type="radio"/> | <input type="radio"/> |
| Do you feel that the community / society is well informed about coronavirus?             | <input type="radio"/> | <input type="radio"/> | <input type="radio"/> |
| Did you feel that you were supported throughout the Coronavirus period?                  | <input type="radio"/> | <input type="radio"/> | <input type="radio"/> |
| Did you make use of the official services (e.g. to buy food) during this period?         | <input type="radio"/> | <input type="radio"/> | <input type="radio"/> |
| Did you feel you could trust Public Health authorities?                                  | <input type="radio"/> | <input type="radio"/> | <input type="radio"/> |
| Do you agree with the measures imposed to reduce the spread of COVID-19 in Malta?        | <input type="radio"/> | <input type="radio"/> | <input type="radio"/> |

30. 4.3 How did others around you react to you being COVID-19 positive? (Please tick all that apply):

*Tick all that apply.*

- I felt that I was stigmatized and that people avoided me
- I think that people were surprised that I was infected with COVID-19
- People were worried about me
- People were angry at me
- People were worried that I infected them with COVID-19
- I felt that people were supportive and did their best to help me get better
- No significant reaction

Other:  \_\_\_\_\_

This is the end of the questionnaire.

Thank you for your help in gathering data about the COVID-19 pandemic, symptoms, and the recovery period.

31. Feel free to write any further comments you might have below:

---

---

---

---

---

---

This content is neither created nor endorsed by Google.

Google Forms
